# Supplementary material for: Multifunctional Sodium Hyaluronate/Chitosan Foam Used as an Absorbable Hemostatic Material
Source: MDPI journal article supplement (doi:10.3390/bioengineering10070868), 2023-07-21
Supplement: s1 [file s1]

## Supplementary Materials

**Table S1** BET analysis of SHCF

| Sample | Surface area (m <sup>2</sup> /g) | Pore volume (cm <sup>3</sup> /g) |
|--------|----------------------------------|----------------------------------|
| SHCF   | 6.974                            | 0.007                            |

**Table S2.** Elastic modulus of SHCF

| Groups                 | 1    | 2     | 3     | Mean, SD  |
|------------------------|------|-------|-------|-----------|
| Elastic modulus (MPa)  | 98.8 | 123.1 | 110.9 | 110.9±9.9 |
| Tensile strength (MPa) | 2.7  | 3.0   | 2.8   | 2.8±0.1   |
| Elongation (%)         | 12.0 | 12.0  | 8.8   | 10.9±1.5  |

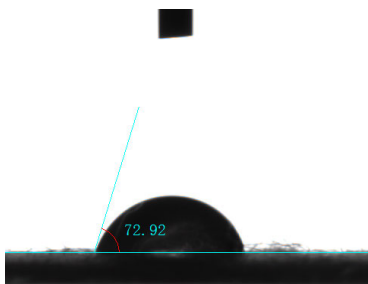

**Figure S1.** Contact angle picture of water droplets with SHCF

**Table S3.** Contact angle and surface free energy of SHCF

| Sample | Contact angle $\theta$ (°) | Surface free energy (mJ·m <sup>-2</sup> ) |
|--------|----------------------------|-------------------------------------------|
| SHCF   | 72.01 ± 0.91               | 37.30 ± 1.4                               |

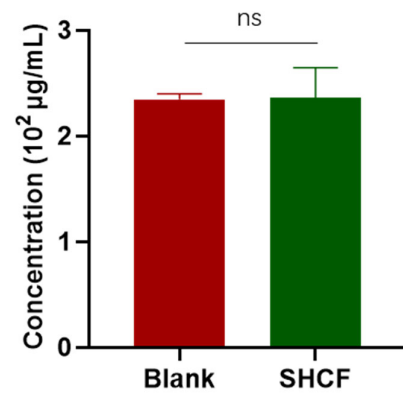

**Figure S2.** IL-1 $\beta$  concentration values in the blank and SHCF groups. Error bar indicate S.D (n = 3), <sup>ns</sup>p > 0.05.

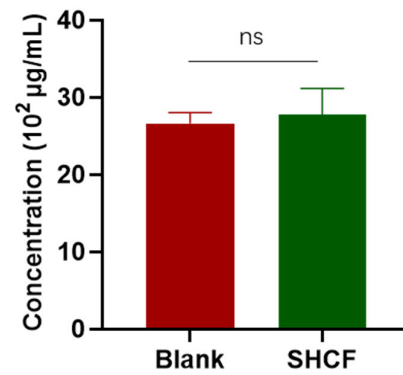

**Figure S3.** IL-6 concentration values in the blank and SHCF groups. Error bar indicate S.D (n = 3), <sup>ns</sup>p > 0.05.

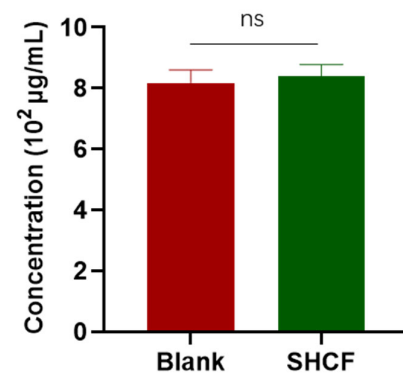

**Figure S4.** TNF- $\alpha$  concentration values in the blank and SHCF groups. Error bar indicate S.D (n = 3), <sup>ns</sup>p > 0.05.
